# Supplementary material for: Quantitative profiling of lipid mediators in sperm cells through on-line dilution on-line polymer matrix-based solid-phase extraction liquid chromatography with mass spectrometric detection
Source: Royal Society of Chemistry journal article supplement (doi:10.1039/d5ay00250h), 2025-01-01
Supplement: d5ay00250h1.pdf [file d5ay00250h1.pdf]

## Supplementary Information

Quantitative profiling of lipid mediators in sperm cells through on-line dilution on-line polymer matrix based solid phase extraction liquid chromatography with mass spectrometry detection

Jörg Fabian\* and Matthias Lehr

### LC-methods

#### Method 1

| Time<br>[min] | Pump 1<br>(LPG/SPE) |       |                                          | Pump 2 (SPE)     |                                 | Pump 3 + 4<br>(binary gradient / analytical) |                           |                  | Trap-Valve  |
|---------------|---------------------|-------|------------------------------------------|------------------|---------------------------------|----------------------------------------------|---------------------------|------------------|-------------|
|               | A [%]               | B [%] | C [%]                                    | Flow<br>[mL/min] | 0.1 % HCOOH<br>Flow<br>[mL/min] | A [%]                                        | B [%]                     | Flow<br>[mL/min] | Position    |
|               | 0.1 %<br>HCOOH      | MeOH  | Isopro-<br>panol /<br>HCOOH<br>(100/0.2) |                  |                                 | MeCN /<br>Water /<br>HCOOH<br>(10/90/0.1)    | MeCN /<br>Water<br>(95/5) |                  |             |
| 0             | 60                  | 40    | 0                                        | 0.5              | 2                               | 90                                           | 10                        | 0.4              | Trap-load   |
| 1.9           |                     |       |                                          |                  | 2                               |                                              |                           |                  |             |
| 2             | 60                  | 40    | 0                                        | 0.5              | 0.001                           | 90                                           | 10                        |                  | Trap-inject |
| 2.1           |                     |       |                                          |                  |                                 |                                              |                           |                  |             |
| 2.15          |                     |       |                                          | 0.5              |                                 |                                              |                           |                  |             |
| 3             | 10                  | 45    | 45                                       | 0.3              |                                 |                                              |                           |                  |             |
| 5             |                     |       |                                          |                  |                                 |                                              |                           |                  |             |
| 11            |                     |       |                                          | 0.3              |                                 | 50                                           | 50                        | 0.4              | Trap-load   |
| 12            |                     |       |                                          | 1                |                                 |                                              |                           |                  |             |
| 15            |                     |       |                                          |                  |                                 | 0                                            | 100                       | 0.4              |             |
| 16            | 10                  | 45    | 45                                       | 1                |                                 |                                              |                           |                  |             |
| 16.1          | 60                  | 40    | 0                                        | 0.5              |                                 |                                              |                           |                  |             |
| 17            |                     |       |                                          |                  |                                 | 0                                            | 100                       | 0.4              |             |
| 18            |                     |       |                                          |                  | 0.001                           | 90                                           | 10                        | 0.4              |             |
| 18.5          |                     |       |                                          |                  | 2                               |                                              |                           |                  |             |
| 24            | 60                  | 40    | 0                                        | 0.5              |                                 | 90                                           | 10                        | 0.4              |             |

Table I: Method 1 was used for the determination of the following analytes: 19(*R*)-Hydroxy-prostaglandin E<sub>1</sub> (19(*R*)-HO-PGE<sub>1</sub>), 19(*R*)-Hydroxy-prostaglandin E<sub>2</sub> (19(*R*)-HO-PGE<sub>2</sub>), Prostaglandin E<sub>1</sub> (PGE<sub>1</sub>), Prostaglandin E<sub>2</sub> (PGE<sub>2</sub>), Prostaglandin D<sub>2</sub> (PGD<sub>2</sub>), Prostaglandin F<sub>2α</sub> (PGF<sub>2α</sub>), Thromboxane B<sub>2</sub> (TXB<sub>2</sub>)

## Method 2

| Time<br>[min] | Pump 1<br>(LPG/SPE) |       |                                          | Pump 2 (SPE)     |                                 | Pump 3 + 4<br>(binary gradient / analytical) |                           |                  | Trap-Valve  |
|---------------|---------------------|-------|------------------------------------------|------------------|---------------------------------|----------------------------------------------|---------------------------|------------------|-------------|
|               | A [%]               | B [%] | C [%]                                    | Flow<br>[mL/min] | 0.1 % HCOOH<br>Flow<br>[mL/min] | A [%]                                        | B [%]                     | Flow<br>[mL/min] | Position    |
|               | 0.1 %<br>HCOOH      | MeOH  | Isopro-<br>panol /<br>HCOOH<br>(100/0.2) |                  |                                 | MeCN /<br>Water /<br>HCOOH<br>(10/90/0.1)    | MeCN /<br>Water<br>(95/5) |                  |             |
| 0             | 40                  | 60    | 0                                        | 0.5              | 2                               | 50                                           | 50                        | 0.4              | Trap-load   |
| 1.9           |                     |       |                                          |                  | 2                               |                                              |                           |                  |             |
| 2             | 40                  | 60    | 0                                        | 0.5              | 0.001                           | 50                                           | 50                        |                  |             |
| 2.1           |                     |       |                                          |                  |                                 |                                              |                           |                  | Trap-inject |
| 2.15          |                     |       |                                          | 0.5              |                                 |                                              |                           |                  |             |
| 3             | 10                  | 45    | 45                                       | 0.3              |                                 |                                              |                           |                  |             |
| 9             |                     |       |                                          | 0.3              |                                 | 0                                            | 100                       | 0.4              |             |
| 10            |                     |       |                                          | 1                |                                 |                                              |                           |                  | Trap-load   |
| 11            |                     |       |                                          |                  |                                 | 0                                            | 100                       | 0.4              |             |
| 13            | 10                  | 45    | 45                                       | 1                |                                 |                                              |                           |                  |             |
| 13.1          | 40                  | 60    | 0                                        | 1                |                                 |                                              |                           |                  |             |
| 14            |                     |       |                                          |                  | 0.001                           | 50                                           | 50                        | 0.4              |             |
| 14.5          |                     |       |                                          | 1                | 2                               |                                              |                           |                  |             |
| 15            |                     |       |                                          | 0.5              |                                 |                                              |                           |                  |             |
| 20            | 40                  | 60    | 0                                        | 0.5              |                                 | 50                                           | 50                        | 0.4              |             |

Table II: Method 2 was used for the determination of the following analytes: 15-Hydroxyeicosatetraenoic acid (15(S)-HETE), Arachidonic acid-d<sub>11</sub> (AA-d<sub>11</sub>), Arachidonylethanolamide (AA-EA), 2-Arachidonoylglycerol (2-AG), 2-Arachidonoylglycerol-d<sub>5</sub> (2-AG-d<sub>5</sub>)

## ISTD-Solution

| Substanz                          | Mass [μg] |
|-----------------------------------|-----------|
| PGE <sub>1</sub> -d <sub>4</sub>  | 2         |
| PGE <sub>2</sub> -d <sub>9</sub>  | 2         |
| PGD <sub>2</sub> -d <sub>4</sub>  | 2         |
| PGF <sub>2α</sub> -d <sub>4</sub> | 2         |
| 2-AG-d <sub>8</sub>               | 4         |
| AA-d <sub>8</sub>                 | 4         |
| AA-EA-d <sub>8</sub>              | 4         |
| 15(S)-HETE-d <sub>8</sub>         | 4         |
| TXB <sub>2</sub> -d <sub>4</sub>  | 2         |

Table III: ISTD-Analytes in 500 mL MeCN:MeOH (50/50, v/v)

# Investigations into the properties of the TurboFlow Cyclone™ SPE column

## Elution behaviour of the eicosanoids on the SPE column

To investigate the elution behaviour of the analytes on the trap column, mobile phase A (acetonitrile / ultrapure water / formic acid (10/90/0.1, v/v/v)) and mobile phase B (acetonitrile / ultrapure water (95/5, v/v)) were mixed in the respective compositions between 10 % and 90 % B. The test solution of the analytes was prepared in 400  $\mu\text{L}$  HTF buffer with 1200  $\mu\text{L}$  ISTD solution at a concentration of 1.25  $\mu\text{g}/\text{mL}$ . In each case, 10  $\mu\text{L}$  of this calibration standard was injected. The LC-MS system shown in Figure 1 was used for the investigations.

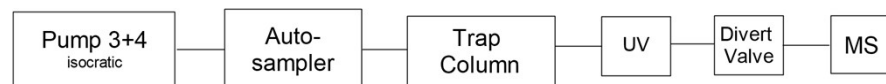

Figure 1: LC-MS system for investigating the elution behaviour of analytes on the SPE column

Figure 2 shows that 19-(*R*)-HO-PGE<sub>2</sub> is eluted quickly and entirely at a mobile phase B concentration of 20%. To maintain an adequate stacking effect on the analytical column, the mobile phase composition was set to 90% A and 10% B as the starting point for the analytical gradient. To ensure that all prostaglandins are completely backflushed from the solid-phase extraction (SPE) column to the analytical column, a backflush time of 9 minutes was selected.

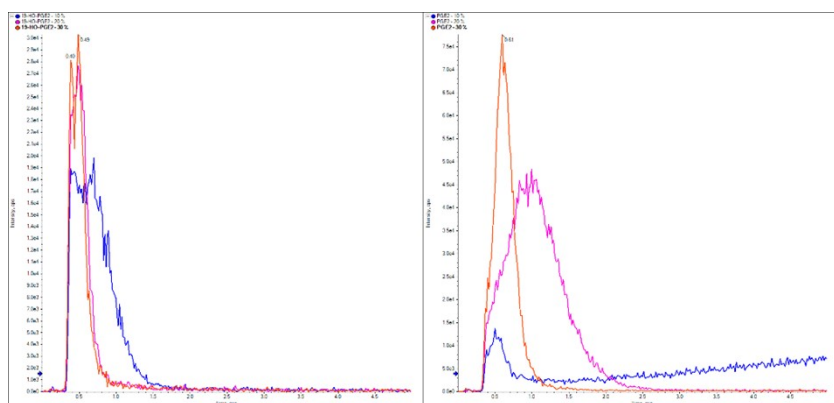

Figure 2: The elution profile of the analytes 19-(*R*)-HO-PGE<sub>2</sub> and PGE<sub>2</sub> on a TurboFlow™ Cyclone column during isocratic elution with 10% (orange), 20% (pink) and 30% (blue) mobile phase B

Figure 3 shows the elution behaviour for the representative analytes 15-HETE and 2-AG. From this, a composition of the mobile phase of the analytical gradient of 50% B can be derived. Due to the increasing proportion of B in backflush mode, all analytes are completely flushed onto the analytical column.

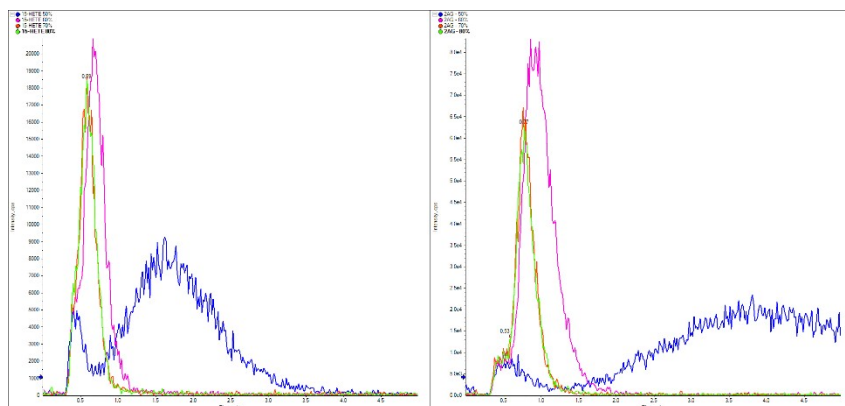

Figure 3: The elution profile of the analytes 15-HETE and 2-AG on a TurboFlow™ Cyclone column during isocratic elution with 50% (blue), 60% (pink), 70% (orange) and 80% (green) mobile phase B.

## Investigation of the retention and recovery behaviour of representative analytes on the SPE column

The chromatographic LC-MS system shown in Figure 4 was used to investigate the retention and recovery behaviour of representative analytes as a function of the composition of the mobile phase of loading pump 2 on the TurboFlow Cyclone™ trap column. The methods were adapted so that the methanol content of the mobile phase of loading pump 1 varied between 20% and 80%. The remaining chromatographic conditions were kept the same in accordance with standard methods 1 and 2. No internal standard was used.

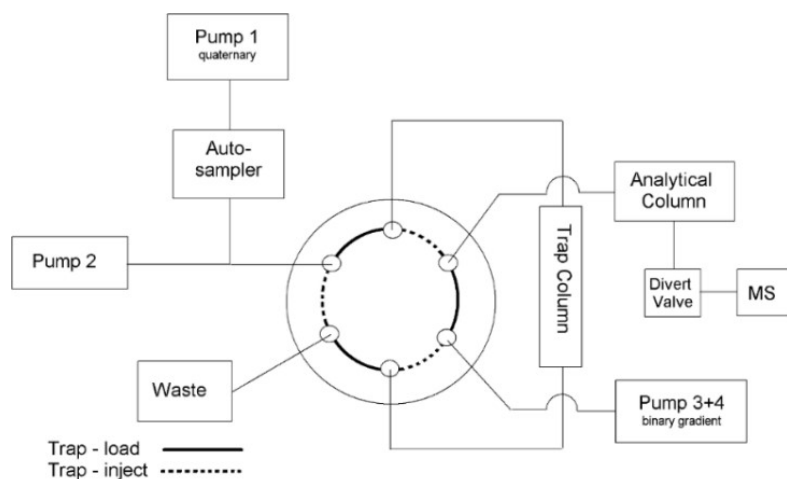

Figure 4: Chromatographic LC-MS system for investigations of retention and recovery behaviour

Figure 5 shows the results for the representative prostaglandins 19-(*R*)-HO-PGE<sub>2</sub> and PGE<sub>2</sub>, and Figure 6 shows the results for 15-HETE, 2-AG and AA-D<sub>11</sub>.

As theoretically expected, the technical recovery increases slightly with decreasing methanol content in the mobile phase. However, since a higher carry-over effect was observed with more lipophilic analytes as the methanol content decreased, a methanol content of 40% was found to be most suitable for the prostaglandins (method 1) and 60% for the other analytes (method 2) proved to be the most suitable.

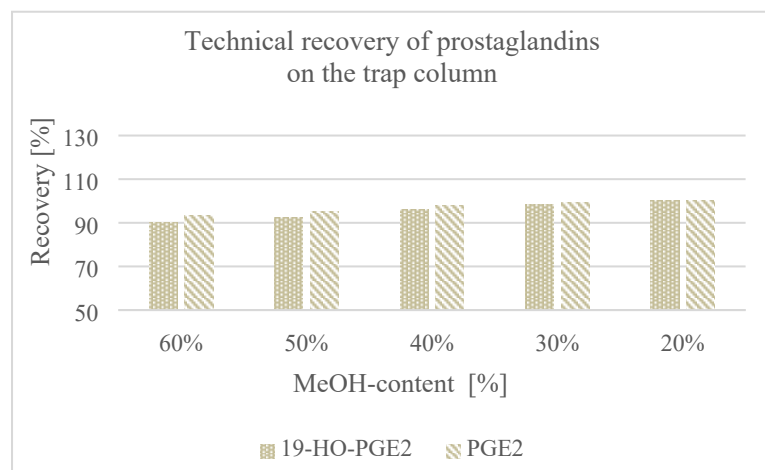

Figure 5: The technical recovery of 19-(*R*)-HO-PGE<sub>2</sub> and PGE<sub>2</sub> on the trap column as a function of the methanol content of the mobile phase of pump 1 is shown. The recovery of the representative prostaglandins increases slightly as the methanol content in the mobile phase of loading pump 1 decreases. The area of the 20% methanol content was set as relative 100% recovery.

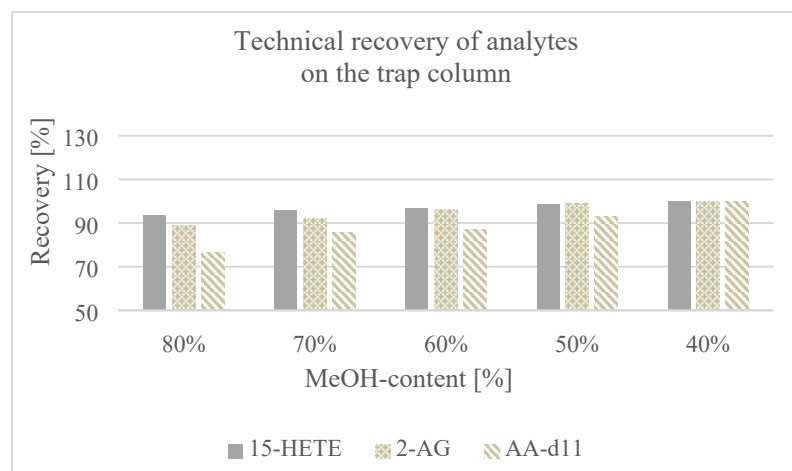

Figure 6: The technical recovery of 15-HETE, 2-AG and AA-d<sub>11</sub> on the trap column as a function of the methanol content of the mobile phase of pump 1 is shown. The recovery of the representative analytes increases slightly as the methanol content in the mobile phase of loading pump 1 decreases. The area of the 20% methanol content was set as relative 100% recovery.

#### Investigation of the injection linearity of the trap column

An analyte solution of 19-(*R*)-HO-PGE<sub>2</sub>, PGE<sub>2</sub>, 15-HETE, 2-AG and AA-d<sub>11</sub> with a concentration of 12.5 ng/mL (ULOQ) was prepared in 400  $\mu$ l HTF buffer and 1200  $\mu$ l MeCN:MeOH (50:50, v/v). Volumes of 50, 100, 150 and 200  $\mu$ l of the analyte solution were injected and analysed using methods 1 and 2. The results were evaluated based on the area.

The result showed an approximately linear relationship with a respective  $r^2$  value of 0.997 to 0.999. Only the residue distribution indicates a slight deviation from linearity. The precision was very high at the same injection volume.

## Accuracy and precision

To determine accuracy and precision, quality control samples were prepared by spiking sperm matrix at four concentration levels (n=5 each) in three different batches that covered the entire calibration range: 0.02 ng (2 x LLOQ- QC), 0.05 ng (low QC), 2 ng (medium QC), 5 ng (high QC).

The within-run accuracy was calculated as the percentage mean of the 5 QC samples of the respective concentration level. The between-run accuracy was calculated as the percentage mean of all 15 QC samples of the respective concentration level of three different batches.

The within-run and between-run precision of the QC-samples is expressed as percent coefficient of variance (CV %).

| Analyte / ISTD                                                  | pg/10 <sup>6</sup><br>sperm<br>cells | With-in run |       |            |       | Between-run |        |
|-----------------------------------------------------------------|--------------------------------------|-------------|-------|------------|-------|-------------|--------|
|                                                                 |                                      | batch       |       | (n=5 each) | batch |             | (n=15) |
|                                                                 |                                      | 1           | 2     | 3          | 1-3   |             |        |
| 19(R)-HO-PGE <sub>1</sub> /<br>-                                | 20                                   | Mean [%]    | 158.2 | 51.2       | 70.0  | MW [%]      | 100.3  |
|                                                                 |                                      | CV [%]      | 13.2  | 21.5       | 74.2  | CV [%]      | 58.2   |
|                                                                 | 50                                   | Mean [%]    | 132.9 | 69.8       | 91.7  | MW [%]      | 100.3  |
|                                                                 |                                      | CV [%]      | 11.1  | 29.0       | 16.4  | CV [%]      | 31.6   |
|                                                                 | 2000                                 | Mean [%]    | 102.3 | 97.0       | 103.2 | MW [%]      | 100.9  |
|                                                                 |                                      | CV [%]      | 0.8   | 4.4        | 2.9   | CV [%]      | 3.8    |
|                                                                 | 5000                                 | Mean [%]    | 94.6  | 99.8       | 102.3 | MW [%]      | 98.4   |
|                                                                 |                                      | CV [%]      | 1.4   | 4.7        | 1.6   | CV [%]      | 4.4    |
| 19(R)-HO-PGE <sub>2</sub> /<br>PGE <sub>2</sub> -d <sub>9</sub> | 20                                   | Mean [%]    | 113.4 | 96.1       | 95.6  | MW [%]      | 102.4  |
|                                                                 |                                      | CV [%]      | 1.5   | 2.9        | 8.6   | CV [%]      | 9.7    |
|                                                                 | 50                                   | Mean [%]    | 108.7 | 97.5       | 103.3 | MW [%]      | 103.5  |
|                                                                 |                                      | CV [%]      | 1.4   | 1.1        | 3.5   | CV [%]      | 5.1    |
|                                                                 | 2000                                 | Mean [%]    | 102.0 | 93.9       | 91.7  | MW [%]      | 96.3   |
|                                                                 |                                      | CV [%]      | 0.8   | 1.4        | 4.3   | CV [%]      | 5.4    |
|                                                                 | 5000                                 | Mean [%]    | 96.5  | 93.9       | 94.0  | MW [%]      | 95.0   |
|                                                                 |                                      | CV [%]      | 1.3   | 2.5        | 3.8   | CV [%]      | 2.7    |
| PGD <sub>2</sub> /<br>PGD <sub>2</sub> -d <sub>4</sub>          | 20                                   | Mean [%]    | 104.4 | 98.2       | 100.0 | MW [%]      | 101.1  |
|                                                                 |                                      | CV [%]      | 1.3   | 2.5        | 2.2   | CV [%]      | 3.3    |
|                                                                 | 50                                   | Mean [%]    | 103.0 | 100.6      | 103.7 | MW [%]      | 102.5  |
|                                                                 |                                      | CV [%]      | 1.8   | 1.6        | 1.9   | CV [%]      | 2.1    |
|                                                                 | 2000                                 | Mean [%]    | 99.3  | 95.3       | 99.7  | MW [%]      | 98.2   |
|                                                                 |                                      | CV [%]      | 1.0   | 2.7        | 1.0   | CV [%]      | 2.6    |
|                                                                 | 5000                                 | Mean [%]    | 90.0  | 91.4       | 94.6  | MW [%]      | 91.7   |
|                                                                 |                                      | CV [%]      | 1.7   | 2.1        | 3.2   | CV [%]      | 3.0    |

| Analyte / ISTD                                            | pg/10 <sup>6</sup><br>sperm<br>cells | With-in run |            |       | Between-run |        |       |
|-----------------------------------------------------------|--------------------------------------|-------------|------------|-------|-------------|--------|-------|
|                                                           |                                      | batch       | (n=5 each) |       | batch       | (n=15) |       |
|                                                           |                                      | 1           | 2          | 3     | 1-3         |        |       |
| PGE <sub>1</sub> /<br>PGE <sub>1</sub> -d <sub>4</sub>    | 20                                   | Mean [%]    | 103.1      | 94.5  | 95.3        | MW [%] | 98.0  |
|                                                           |                                      | CV [%]      | 3.9        | 7.0   | 5.5         | CV [%] | 6.4   |
|                                                           | 50                                   | Mean [%]    | 103.8      | 95.7  | 99.6        | MW [%] | 99.9  |
|                                                           |                                      | CV [%]      | 1.5        | 2.8   | 3.1         | CV [%] | 4.2   |
|                                                           | 2000                                 | Mean [%]    | 101.9      | 93.3  | 99.3        | MW [%] | 98.4  |
|                                                           |                                      | CV [%]      | 1.5        | 1.7   | 2.0         | CV [%] | 4.1   |
|                                                           | 5000                                 | Mean [%]    | 97.3       | 95.2  | 95.5        | MW [%] | 96.1  |
|                                                           |                                      | CV [%]      | 1.0        | 2.1   | 3.8         | CV [%] | 2.4   |
| PGE <sub>2</sub> /<br>PGE <sub>2</sub> -d <sub>9</sub>    | 20                                   | Mean [%]    | 106.0      | 97.6  | 97.9        | MW [%] | 100.9 |
|                                                           |                                      | CV [%]      | 3.5        | 1.6   | 1.4         | CV [%] | 4.7   |
|                                                           | 50                                   | Mean [%]    | 104.3      | 98.2  | 102.7       | MW [%] | 101.9 |
|                                                           |                                      | CV [%]      | 1.0        | 1.2   | 2.3         | CV [%] | 3.0   |
|                                                           | 2000                                 | Mean [%]    | 102.7      | 94.6  | 99.0        | MW [%] | 99.0  |
|                                                           |                                      | CV [%]      | 1.7        | 2.8   | 2.4         | CV [%] | 4.1   |
|                                                           | 5000                                 | Mean [%]    | 97.1       | 94.6  | 95.9        | MW [%] | 96.0  |
|                                                           |                                      | CV [%]      | 1.2        | 1.9   | 1.6         | CV [%] | 1.9   |
| PGF <sub>2</sub> α /<br>PGF <sub>2</sub> α-d <sub>4</sub> | 20                                   | Mean [%]    | 105.2      | 97.7  | 93.9        | MW [%] | 99.3  |
|                                                           |                                      | CV [%]      | 2.9        | 4.2   | 3.2         | CV [%] | 5.9   |
|                                                           | 50                                   | Mean [%]    | 102.3      | 96.3  | 98.0        | MW [%] | 99.1  |
|                                                           |                                      | CV [%]      | 3.8        | 2.9   | 2.5         | CV [%] | 4.0   |
|                                                           | 2000                                 | Mean [%]    | 101.9      | 93.2  | 96.3        | MW [%] | 97.4  |
|                                                           |                                      | CV [%]      | 1.2        | 1.9   | 0.9         | CV [%] | 4.1   |
|                                                           | 5000                                 | Mean [%]    | 97.7       | 94.8  | 94.1        | MW [%] | 95.8  |
|                                                           |                                      | CV [%]      | 0.7        | 1.2   | 2.0         | CV [%] | 2.1   |
| TXB <sub>2</sub> /<br>TXB <sub>2</sub> -d <sub>4</sub>    | 20                                   | Mean [%]    | 116.7      | 100.6 | 101.5       | MW [%] | 106.9 |
|                                                           |                                      | CV [%]      | 0.8        | 2.3   | 1.3         | CV [%] | 7.4   |
|                                                           | 50                                   | Mean [%]    | 108.2      | 100.4 | 99.9        | MW [%] | 103.2 |
|                                                           |                                      | CV [%]      | 1.6        | 1.8   | 10.8        | CV [%] | 6.8   |
|                                                           | 2000                                 | Mean [%]    | 99.6       | 94.9  | 100.1       | MW [%] | 98.3  |
|                                                           |                                      | CV [%]      | 0.3        | 1.3   | 0.6         | CV [%] | 2.5   |
|                                                           | 5000                                 | Mean [%]    | 95.4       | 96.1  | 95.8        | MW [%] | 95.7  |
|                                                           |                                      | CV [%]      | 0.4        | 0.6   | 6.2         | CV [%] | 3.2   |

| Analyte / ISTD                               | pg/10 <sup>6</sup><br>sperm<br>cells | With-in run |       |            |       | Between-run |        |
|----------------------------------------------|--------------------------------------|-------------|-------|------------|-------|-------------|--------|
|                                              |                                      | batch       |       | (n=5 each) | batch |             | (n=15) |
|                                              |                                      | 1           | 2     | 3          | 1-3   |             |        |
| 15-HETE /<br>15-HETE-d <sub>4</sub>          | 20                                   | Mean [%]    | 110.1 | 95.0       | 99.6  | MW [%]      | 101.6  |
|                                              |                                      | CV [%]      | 1.2   | 1.2        | 3.0   | CV [%]      | 6.7    |
|                                              | 50                                   | Mean [%]    | 106.7 | 95.2       | 95.5  | MW [%]      | 99.1   |
|                                              |                                      | CV [%]      | 1.8   | 1.4        | 1.3   | CV [%]      | 5.7    |
|                                              | 2000                                 | Mean [%]    | 104.5 | 95.1       | 96.9  | MW [%]      | 98.8   |
|                                              |                                      | CV [%]      | 0.7   | 0.7        | 0.3   | CV [%]      | 4.3    |
|                                              | 5000                                 | Mean [%]    | 103.6 | 100.9      | 101.8 | MW [%]      | 102.1  |
|                                              |                                      | CV [%]      | 0.6   | 0.5        | 0.6   | CV [%]      | 1.3    |
| AA-EA /<br>AA-EA-d <sub>8</sub>              | 20                                   | Mean [%]    | 99.8  | 98.5       | 101.0 | MW [%]      | 99.8   |
|                                              |                                      | CV [%]      | 4.4   | 5.3        | 5.5   | CV [%]      | 4.9    |
|                                              | 50                                   | Mean [%]    | 101.1 | 97.2       | 98.1  | MW [%]      | 98.8   |
|                                              |                                      | CV [%]      | 3.9   | 2.8        | 6.8   | CV [%]      | 4.8    |
|                                              | 2000                                 | Mean [%]    | 101.1 | 93.6       | 98.5  | MW [%]      | 97.8   |
|                                              |                                      | CV [%]      | 2.2   | 1.0        | 1.3   | CV [%]      | 3.6    |
|                                              | 5000                                 | Mean [%]    | 98.8  | 97.3       | 101.6 | MW [%]      | 99.2   |
|                                              |                                      | CV [%]      | 1.7   | 2.4        | 1.2   | CV [%]      | 2.5    |
| 2-AG /<br>2-AG-d <sub>8</sub>                | 20                                   | Mean [%]    | 108.2 | 90.6       | 95.1  | MW [%]      | 98.0   |
|                                              |                                      | CV [%]      | 2.4   | 6.5        | 4.8   | CV [%]      | 8.9    |
|                                              | 50                                   | Mean [%]    | 104.0 | 96.8       | 101.5 | MW [%]      | 100.8  |
|                                              |                                      | CV [%]      | 2.6   | 2.6        | 2.2   | CV [%]      | 3.8    |
|                                              | 2000                                 | Mean [%]    | 97.9  | 94.0       | 105.9 | MW [%]      | 99.3   |
|                                              |                                      | CV [%]      | 1.6   | 1.3        | 0.6   | CV [%]      | 5.2    |
|                                              | 5000                                 | Mean [%]    | 97.9  | 98.6       | 110.9 | MW [%]      | 102.5  |
|                                              |                                      | CV [%]      | 1.3   | 0.5        | 1.0   | CV [%]      | 6.1    |
| 2-AG-d <sub>5</sub> /<br>2-AG-d <sub>8</sub> | 20                                   | Mean [%]    | 110.6 | 90.9       | 95.1  | MW [%]      | 98.9   |
|                                              |                                      | CV [%]      | 2.7   | 6.6        | 3.7   | CV [%]      | 9.7    |
|                                              | 50                                   | Mean [%]    | 104.5 | 94.2       | 100.7 | MW [%]      | 99.8   |
|                                              |                                      | CV [%]      | 2.9   | 1.7        | 1.8   | CV [%]      | 5.0    |
|                                              | 2000                                 | Mean [%]    | 98.7  | 91.6       | 103.4 | MW [%]      | 97.5   |
|                                              |                                      | CV [%]      | 1.3   | 1.3        | 0.7   | CV [%]      | 5.2    |
|                                              | 5000                                 | Mean [%]    | 98.4  | 95.8       | 109.3 | MW [%]      | 101.2  |
|                                              |                                      | CV [%]      | 1.1   | 0.6        | 0.4   | CV [%]      | 6.0    |



| Analyte / ISTD                            | pg/10 <sup>6</sup><br>sperm<br>cells | With-in run |            |       | Between-run |        |       |
|-------------------------------------------|--------------------------------------|-------------|------------|-------|-------------|--------|-------|
|                                           |                                      | batch       | (n=5 each) |       | batch       | (n=15) |       |
|                                           |                                      | 1           | 2          | 3     | 1-3         |        |       |
| AA-d <sub>11</sub> /<br>AA-d <sub>8</sub> | 20                                   | Mean [%]    | 115.5      | 102.7 | 118.1       | MW [%] | 112.1 |
|                                           |                                      | CV [%]      | 5.4        | 11.4  | 11.7        | CV [%] | 11.1  |
|                                           | 50                                   | Mean [%]    | 106.6      | 110.2 | 111.1       | MW [%] | 109.3 |
|                                           |                                      | CV [%]      | 5.9        | 8.2   | 4.1         | CV [%] | 6.2   |
|                                           | 2000                                 | Mean [%]    | 101.2      | 95.7  | 98.0        | MW [%] | 98.3  |
|                                           |                                      | CV [%]      | 0.6        | 1.4   | 1.0         | CV [%] | 2.5   |
|                                           | 5000                                 | Mean [%]    | 99.7       | 100.7 | 101.5       | MW [%] | 100.6 |
|                                           |                                      | CV [%]      | 1.1        | 0.8   | 1.2         | CV [%] | 1.3   |

Table IV

## Linearity

Standard curves were prepared for all analytes with 9 calibration points ranging from 0.01 to 5 ng /  $1 \times 10^6$  sperm. For PGD<sub>2</sub>, the calibration range was only covered up to 2 ng /  $1 \times 10^6$  sperm. A 1 / x weighted linear regression analysis of the area ratios (peak area analyte/peak area of the internal deuterated standard) was performed. The calibration for 19(R)-Hydroxy-PGE<sub>1</sub> was performed without considering of an ISTD. The lower limit of quantification (LLOQ) was set at the lowest concentration of the calibration standards. The signal-to-noise ratio of the matrix standards at the LLOQ gives a hint of a detection limit.

| Analyte/ISTD                                                    |                   | Matrix matched-STD                            | Matrix-STD                                     | Lösemittel-STD                                 | S/N at LLOQ<br>Matrix-STD |
|-----------------------------------------------------------------|-------------------|-----------------------------------------------|------------------------------------------------|------------------------------------------------|---------------------------|
| 19(R)-HO-PGE <sub>1</sub> /<br>-                                | Calibration curve | $y = 507.782 x + 192250$<br>$r = 0.99986$     | $y = 496.59 x + 195803$<br>$r = 0.9996$        | $y = 342.76 x + 12940$<br>$r = 0.9984$         | 228                       |
| 19(R)-HO-PGE <sub>2</sub> /<br>PGE <sub>2</sub> -d <sub>9</sub> | Calibration curve | $y = 0.00102 x + 0.02306$<br>$r = 0.99970$    | $y = 0.00103 x + 0.02157$<br>$r = 0.99990$     | $y = 0.000644 x + 0.000897$<br>$r = 0.9999$    | 600                       |
| PGD <sub>2</sub> /<br>PGD <sub>2</sub> -d <sub>4</sub>          | Calibration curve | $y = 0.00189 x + 0.00616$<br>$r = 0.99981$    | $y = 0.00191 x + 0.00202$<br>$r = 0.9999$      | $y = 0.00183 x + 0.00405$<br>$r = 0.9996$      | 32                        |
| PGE <sub>1</sub> /<br>PGE <sub>1</sub> -d <sub>4</sub>          | Calibration curve | $y = 0.00160 x + 0.01193$<br>$r = 0.9997$     | $y = 0.00163 x + 0.00978$<br>$r = 0.9997$      | $y = 0.00162 x + 0.00355$<br>$r = 0.9994$      | 74                        |
| PGE <sub>2</sub> /<br>PGE <sub>2</sub> -d <sub>9</sub>          | Calibration curve | $y = 0.00165 x + 0.01439$<br>$r = 0.9995$     | $y = 0.00167 x + 0.01134$<br>$r = 0.9998$      | $y = 0.00172 x + 0.00249$<br>$r = 0.9997$      | 65                        |
| PGF <sub>2α</sub> /<br>PGF <sub>2α</sub> -d <sub>4</sub>        | Calibration curve | $y = 0.00129 x + 0.00202$<br>$r = 0.9998$     | $y = 0.00131 x + 0.000586$<br>$r = 0.9999$     | $y = 0.00135 x + 0.000421$<br>$r = 0.9990$     | 49                        |
| TXB <sub>2</sub> -/<br>TXB <sub>2</sub> -d <sub>4</sub>         | Calibration curve | $y = 0.00152 x + 0.00321$<br>$r = 0.99986$    | $y = 0.00157 x + 0.0009798$<br>$r = 0.9990$    | $y = 0.00158 x + 0.00222$<br>$r = 0.9989$      | 250                       |
| 15-HETE/<br>15-HETE-d <sub>4</sub>                              | Calibration curve | $y = 0.00094596 x + 0.00605$<br>$r = 0.9999$  | $y = 0.0009573 x + 0.00421$<br>$r = 0.9991$    | $y = 0.000971692 x + 0.00151$<br>$r = 0.9987$  | 250                       |
| AA-EA/<br>AA-EA-d <sub>8</sub>                                  | Calibration curve | $y = 0.00101 x + 0.00637$<br>$r = 0.99959$    | $y = 0.00103 x + 0.00505$<br>$r = 0.9994$      | $y = 0.00106 x + 0.00481$<br>$r = 0.9990$      | 57                        |
| 2-AG/<br>2-AG-d <sub>8</sub>                                    | Calibration curve | $y = 0.00845 x + 0.07496$<br>$r = 0.9997$     | $y = 0.00886 x + 0.03984$<br>$r = 0.9996$      | $y = 0.00856 x + 0.02363$<br>$r = 0.9988$      | 97                        |
| 2-AG-d <sub>5</sub> /<br>2-AG-d <sub>8</sub>                    | Calibration curve | $y = 0.00449 x + 0.01594$<br>$r = 0.9999$     | $y = 0.00464 x + 0.00562$<br>$r = 0.99953$     | $y = 0.00460 x + 0.01247$<br>$r = 0.9989$      | 125                       |
| AA-d <sub>11</sub> /<br>AA-d <sub>8</sub>                       | Calibration curve | $y = 0.0001656 x + 0.0006362$<br>$r = 0.9999$ | $y = 0.0001682 x - 0.00003338$<br>$r = 0.9993$ | $y = 0.00017186 x + 0.0002886$<br>$r = 0.9993$ | 28                        |

Table V

## Individual MRM transitions with their measurement parameters

| ID                                | Q 1 Mass | Q3 Mass | RT-method 1 | RT-method 2 | Polarity | DP (volts) | EP (volts) | CE (volts) | CXP (volts) |
|-----------------------------------|----------|---------|-------------|-------------|----------|------------|------------|------------|-------------|
| 19-HO-PGE <sub>2</sub>            | 367.11   | 331.20  | 5.60        |             | neg.     | -65.00     | -10.00     | -20.00     | -17.00      |
| 19-HO-PGE <sub>2</sub>            | 367.11   | 287.20  | 5.60        |             | neg.     | -65.00     | -10.00     | -26.00     | -15.00      |
| 19-HO-PGE <sub>1</sub>            | 369.08   | 333.10  | 6.00        |             | neg.     | -60.00     | -10.00     | -22.00     | -19.00      |
| 19-HO-PGE <sub>1</sub>            | 369.08   | 235.00  | 6.00        |             | neg.     | -60.00     | -10.00     | -24.00     | -13.00      |
| TXB <sub>2</sub>                  | 369.14   | 195.10  | 8.90        |             | neg.     | -40.00     | -10.00     | -18.00     | -11.00      |
| TXB <sub>2</sub>                  | 369.14   | 169.00  | 8.90        |             | neg.     | -40.00     | -10.00     | -22.00     | -15.00      |
| TXB <sub>2</sub> -d <sub>4</sub>  | 373.12   | 173.10  | 8.90        |             | neg.     | -50.00     | -10.00     | -24.00     | -9.00       |
| PGF <sub>2α</sub>                 | 353.13   | 309.10  | 8.90        |             | neg.     | -65.00     | -10.00     | -26.00     | -12.00      |
| PGF <sub>2α</sub>                 | 353.13   | 193.00  | 8.90        |             | neg.     | -65.00     | -10.00     | -34.00     | -12.00      |
| PGF <sub>2α</sub> -d <sub>4</sub> | 357.12   | 313.30  | 8.90        |             | neg.     | -65.00     | -10.00     | -26.00     | -15.00      |
| PGE <sub>2</sub>                  | 351.12   | 271.10  | 9.20        |             | neg.     | -35.00     | -10.00     | -22.00     | -19.00      |
| PGE <sub>2</sub>                  | 351.12   | 315.00  | 9.20        |             | neg.     | -35.00     | -10.00     | -16.00     | -17.00      |
| PGE <sub>2</sub> -d <sub>9</sub>  | 360.18   | 280.20  | 9.20        |             | neg.     | -65.00     | -10.00     | -24.00     | -15.00      |
| PGE <sub>1</sub>                  | 353.14   | 235.00  | 9.40        |             | neg.     | -55.00     | -10.00     | -20.00     | -25.00      |
| PGE <sub>1</sub>                  | 353.14   | 317.00  | 9.40        |             | neg.     | -55.00     | -10.00     | -20.00     | -17.00      |
| PGE <sub>1</sub> -d <sub>4</sub>  | 357.15   | 239.10  | 9.40        |             | neg.     | -40.00     | -10.00     | -22.00     | -11.00      |
| PGD <sub>2</sub>                  | 351.12   | 271.20  | 9.60        |             | neg.     | -30.00     | -10.00     | -24.00     | -23.00      |
| PGD <sub>2</sub>                  | 351.12   | 315.20  | 9.60        |             | neg.     | -30.00     | -10.00     | -16.00     | -15.00      |
| PGD <sub>2</sub> -d <sub>4</sub>  | 355.10   | 275.10  | 9.60        |             | neg.     | -40.00     | -10.00     | -24.00     | -15.00      |
| 15-HETE                           | 319.12   | 219.00  | 14.10       | 6.30        | neg.     | -15.00     | -10.00     | -18.00     | -17.00      |
| 15-HETE                           | 319.12   | 257.30  | 14.10       | 6.30        | neg.     | -15.00     | -10.00     | -20.00     | -13.00      |
| 15-HETE-d <sub>8</sub>            | 327.18   | 226.10  | 14.10       | 6.30        | neg.     | -35.00     | -10.00     | -18.00     | -9.00       |
| AA-EA                             | 348.28   | 287.30  | 15.00       | 7.50        | pos.     | 46.00      | 10.00      | 15.00      | 20.00       |
| AA-EA                             | 348.28   | 203.20  | 15.00       | 7.50        | pos.     | 46.00      | 10.00      | 19.00      | 12.00       |
| AA-EA-d <sub>8</sub>              | 356.20   | 294.10  | 15.00       | 7.50        | pos.     | 86.00      | 10.00      | 27.00      | 34.00       |
| 2-AG                              | 379.25   | 287.30  | 15.43       | 8.10        | pos.     | 50.00      | 10.00      | 19.00      | 20.00       |
| 2-AG                              | 379.25   | 269.30  | 15.43       | 8.10        | pos.     | 50.00      | 10.00      | 21.00      | 16.00       |
| 2-AG-d <sub>5</sub>               | 384.35   | 287.30  | 15.40       | 8.10        | pos.     | 71.00      | 10.00      | 21.00      | 18.00       |
| 2-AG-d <sub>5</sub>               | 384.35   | 269.40  | 15.40       | 8.10        | pos.     | 71.00      | 10.00      | 23.00      | 18.00       |
| 2-AG d <sub>8</sub>               | 387.03   | 294.10  | 15.43       | 8.10        | pos.     | 36.00      | 10.00      | 17.00      | 18.00       |
| AA                                | 303.10   | 259.20  | 16.00       | 9.10        | neg.     | -70.00     | -10.00     | -18.00     | -13.00      |
| AA                                | 303.10   | 205.00  | 16.00       | 9.10        | neg.     | -70.00     | -10.00     | -20.00     | -9.00       |
| AA-d <sub>11</sub>                | 314.19   | 270.30  | 16.00       | 9.10        | neg.     | -30.00     | -10.00     | -18.00     | -15.00      |
| AA-d <sub>11</sub>                | 314.19   | 216.20  | 16.00       | 9.10        | neg.     | -30.00     | -10.00     | -20.00     | -13.00      |
| AA-d <sub>8</sub>                 | 311.17   | 267.30  | 16.00       | 9.10        | neg.     | -40.00     | -10.00     | -18.00     | -13.00      |

Table VI
